# Supplementary material for: Characterization of peptide O⋯HN hydrogen bonds via 1 H-detected 15 N/ 17 O solid-state NMR spectroscopy
Source: Royal Society of Chemistry journal article supplement (doi:10.1039/d2cc07004a), 2023-01-01
Supplement: d2cc07004a1.pdf [file d2cc07004a1.pdf]

## Supplementary Information

### Characterization of peptide O $\cdots$ HN hydrogen bonds via $^1\text{H}$ -detected $^{15}\text{N}/^{17}\text{O}$ solid-state NMR spectroscopy

Ivan Hung,<sup>\*a</sup> Wenping Mao,<sup>a</sup> Eric G. Keeler,<sup>†b</sup> Robert G. Griffin,<sup>b</sup> Peter L. Gor'kov,<sup>a</sup> Zhehong Gan<sup>a</sup>

<sup>a</sup> National High Magnetic Field Laboratory  
1800 East Paul Dirac Drive  
Tallahassee, Florida 32310  
USA

<sup>b</sup> Department of Chemistry and Francis Bitter Magnet Laboratory  
Massachusetts Institute of Technology  
Cambridge, Massachusetts 02139  
USA

<sup>†</sup> Current address: New York Structural Biology Center  
89 Convent Avenue  
New York, New York 10027  
USA

<sup>\*</sup> *Corresponding author e-mail:* hung@magnet.fsu.edu

## Experimental methods

The N-acetyl-[U-<sup>13</sup>C,<sup>15</sup>N,70%-<sup>17</sup>O]-L-valyl-L-leucine (N-Ac-VL) sample used here was prepared by <sup>17</sup>O labeling U-<sup>13</sup>C,<sup>15</sup>N-FMOC-L-valine and U-<sup>13</sup>C,<sup>15</sup>N-FMOC-L-leucine with H<sub>2</sub><sup>17</sup>O via a multiple turnover reaction.<sup>1</sup> The procedure involves reacting an FMOC, BOC, Trt, or OtBu amino acid with excess carbodiimide and in this case 70% H<sub>2</sub><sup>17</sup>O. The reaction is a kinetically enhanced multiple turnover process that provides the <sup>17</sup>O-labeled FMOC amino acids in high yield and an isotopic enrichment equal to that of the starting H<sub>2</sub><sup>17</sup>O. It appears to be a generally applicable approach for <sup>17</sup>O carboxyl groups. Further details of the procedure are available in Refs. 1,2.

NMR experiments were acquired at 18.8 T on a Bruker Avance III HD console using a triple-resonance probe designed and constructed at the NHMFL using a JEOL 0.75 mm MAS stator. The carrier frequencies for <sup>1</sup>H, <sup>17</sup>O, and <sup>15</sup>N were 800.12, 108.48, and 81.08 MHz, respectively. All experiments were performed at a spinning frequency  $\omega_r/2\pi = 90$  kHz. In all instances, the initial <sup>17</sup>O polarization was enhanced by saturation/inversion of the <sup>17</sup>O satellite-transitions using a WURST pulse<sup>3,4</sup> with a sweep width equal to the MAS frequency of 90 kHz, 1 ms pulse duration, peak *rf* field  $\omega_1/2\pi = 12.4$  kHz, and an offset of +450 kHz, leading to <sup>17</sup>O signal enhancement for the N-Ac-VL sample by a factor of approximately three. Other experimental parameters are given in Figs. S1-S3. The cosine low-power MQMAS sequence (cos-1pMQMAS)<sup>5,6</sup> with triple-/single-quantum split-*t*<sub>1</sub> evolution was used to obtain isotropic <sup>17</sup>O resolution using cosine pulses with a duration of two rotor periods, and a ratio  $k = 19/12$  for  $S = 5/2$  nuclei.<sup>7,8</sup> For <sup>1</sup>H-<sup>17</sup>O heteronuclear dipolar recoupling during the RESPDOR<sup>9</sup> portion of the ohNH<sup>{O}</sup> experiment, the SR4<sup>2</sup><sub>1</sub> sequence<sup>10</sup> was used on the <sup>1</sup>H channel at an *rf* field amplitude  $\omega_1/2\pi$  twice the spinning frequency, 180 kHz. The RESPDOR build-up curve was fit using the following equation<sup>11</sup>

$$(1 - S_r/S_0) = \frac{5}{6} - \frac{\pi\sqrt{2}}{144} \sum_{k=1}^5 [10 - 2(k-1)] J_{1/4} \left( \frac{k\pi d_{HO} t_{mix}}{4} \right) J_{-1/4} \left( \frac{k\pi d_{HO} t_{mix}}{4} \right)$$

where  $J_{\pm 1/4}$  are Bessel functions of the first kind,  $d_{HO}$  is the  $^1\text{H}$ - $^{17}\text{O}$  dipolar coupling, and  $t_{mix}$  is the total duration of SR4 $^2_1$  dipolar recoupling. The dipolar coupling in units of hertz is defined as

$$d_{HO} = -\frac{\gamma_H \gamma_O \hbar}{2\pi r_{HO}^3} \cdot 10^{-7}$$

where  $\gamma_H$  ( $26.75222 \times 10^7 \text{ rad} \cdot \text{T}^{-1} \cdot \text{s}^{-1}$ ) and  $\gamma_O$  ( $-36.264 \times 10^7 \text{ rad} \cdot \text{T}^{-1} \cdot \text{s}^{-1}$ ) are the gyromagnetic ratios of the  $^1\text{H}$  and  $^{17}\text{O}$  nuclei,  $\hbar$  ( $1.05457 \times 10^{-34} \text{ J} \cdot \text{s}$ ) is Planck's constant divided by  $\pi$ , and  $r_{HO}$  is the distance in meters between the H and O sites. The dipolar coupling between  $^{15}\text{N}$  and  $^{17}\text{O}$  nuclei can be calculated using the above equation by replacing the  $^1\text{H}$  related parameters with  $^{15}\text{N}$  ones, e.g.,  $\gamma_N = -2.7116 \times 10^7 \text{ rad} \cdot \text{T}^{-1} \cdot \text{s}^{-1}$ .

$^1\text{H}$  chemical shifts were referenced indirectly to neat tetramethylsilane ( $\delta_{iso} = 0 \text{ ppm}$ ) by setting the highest frequency peak of histidine $\cdot\text{HCl} \cdot \text{H}_2\text{O}$  to 17.2 ppm.<sup>12</sup>  $^{15}\text{N}$  and  $^{17}\text{O}$  shifts were referenced to liquid  $\text{NH}_3$  and  $\text{D}_2\text{O}$  at 0 ppm, respectively, by using the reference frequency for  $^1\text{H}$  at 0 ppm and the IUPAC recommended standard frequency ratios.<sup>13</sup> All spectra were processed using Bruker Topspin 4.1.1 and imported into MATLAB R2020b Update 6 (9.9.0.1718557) for analysis and plotting. The isotropic  $^{17}\text{O}$  dimension of 3D spectra, the axis was scaled and referenced according to the 'unified' convention for MQMAS and STMAS.<sup>14</sup> Essentially, the  $^{17}\text{O}$  spectral window was divided by a factor  $(3 - k) = 17/12$ , while keeping the Larmor frequency and shift reference the same as for conventional 1D  $^{17}\text{O}$  spectra.

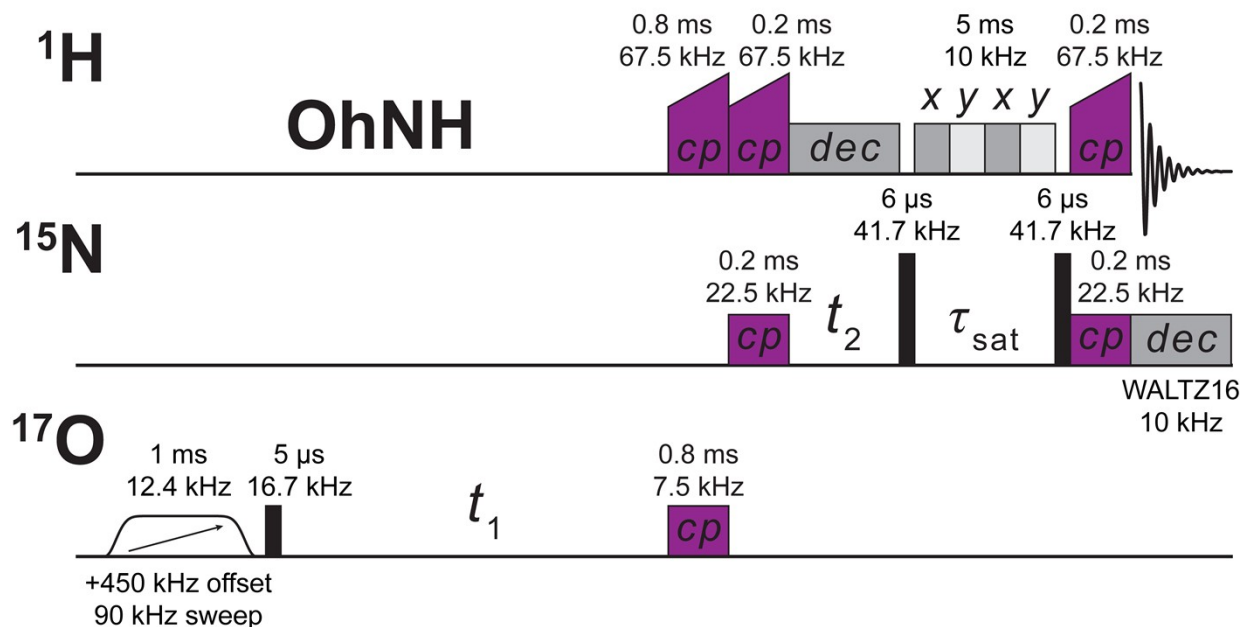

$$t_1: 32 \times 22.2 \mu\text{s} = 0.71 \text{ ms}$$

$$t_2: 32 \times 800 \mu\text{s} = 25.6 \text{ ms}$$

128 transients, 0.05 s recycle delay, experimental time = 11.8 hr

**Fig. S1.** Pulse sequence schematic and experimental parameters used for the three-dimensional OhNH experiment.

```

----- OhNH pulse sequence in Bruker format -----
; OhNH.ih - written by ivan
; - 3D H/N/O correlation under fast MAS
; - O(aniso) -(CP)-> H -(CP)-> N -(CP)-> H

;parameters:
;ns : 4*n
;p1 : 1H 90 pulse at PL1
;p2 : 15N 90 pulse at PL2
;p3 : 17O 90 pulse at PL3
;p8 : ST-saturation WURST pulse at SP8
;p14 : 17O->1H contact time at SP5(1H) + PL9(17O)
;p15 : 1H->15N contact time at SP0(1H) + PL5(15N)
;p16 : 15N->1H contact time at SP1(1H) + PL6(15N)
;p27 : duration of water suppression (MISSISSIPI)
;pcpd1 : =25us for 10kHz waltz16
;pcpd2 : =25us for 10kHz waltz16
;d0 : initial t2 delay
;d1 : recycle delay
;d20 : initial t1 delay
;in0 : = t2(15N) increment
;in20 : = t1(17O) increment

```

```

;p11 : 1H pulse power level
;p12 : 15N pulse power level
;p13 : 170 pulse power level
;p15 : 15N CP(1H->15N) power level
;p16 : 15N CP(15N->1H) power level
;p19 : CP(170->1H) power level
;p111 : 1H dec power level
;p112 : 15N dec power level
;p117 : 1H WS power level
;sp0 : 1H CP(1H->15N) power level
;sp1 : 1H CP(15N->1H) power level
;sp5 : 1H CP(1H->170) power level
;sp8 : ST-saturation WURST power level
;spnam8 : WURST shape, linear frequency sweep
;spoffs8 : ST-saturation WURST offset
;cpdprg1 : waltz16 at PL11
;cpdprg2 : waltz16 at PL12
;l30 : # rotor periods for WURST pulse
;$TYPE=ivan

"p8=1s*130/cnst31"
"d0=0"
"d20=0"

aqseq 312

1 ze
2 10m do:f2
  d1

  (p8:sp8 ph20):f3 ;WURST ST saturation pulse
  3u

  5u p11:f1 p15:f2 p13:f3
  (p3 ph1):f3 ;170 90 pulse

  d20 ; 170 t1 evolution

  (p14:sp5 ph22):f1 (p14 ph20 p19):f3 ;170->1H CP

  (p15:sp0 ph20):f1 (p15 ph2 p15):f2 ;1H->15N CP
  1u p111:f1
  (1u cpds1):f1
  (center (d0):f2 (p3*2 ph20 p13):f3) ;170 pi-pulse @ mid t2
  2u
  (ralign (1u do):f1 (p2 ph20 p12):f2) ;15N 90 for z-filter

  (p27*0.25 ph20 p217):f1 ;MISSISSIPI
  (p27*0.25 ph21):f1
  (p27*0.25 ph22):f1
  (p27*0.25 ph23):f1
  (p2 ph3):f2 ;15N 90

  (p16:sp1 ph4):f1 (p16 ph20 p16):f2 ;15N->1H CP
  0.5u p112:f2
  go=2 ph31 cpds2:f2 finally do:f2
  1u do:f2

```

```

10m mc #0 to 2
  F1PH( calph(ph1,+90), caldel(d20,+in20) )
  F2PH( calph(ph2,+90), caldel(d0,+in0) )
exit

```

```

ph1= 1 3
ph2= 1
ph3= 1 1 3 3
ph4={1}*4 {3}*4 {0}*4 {2}*4
ph20=0
ph21=1
ph22=2
ph23=3
ph31={0 2 2 0}^2^3^1

```

----- OhNH pulse sequence in Bruker format -----

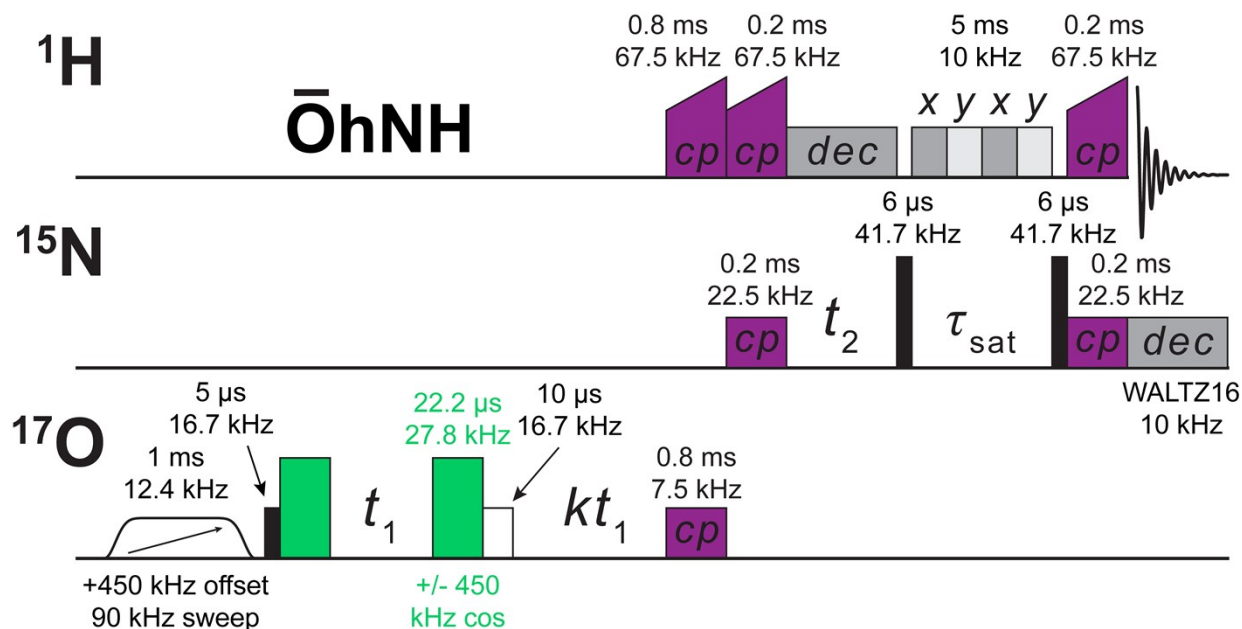

$$k = 19/12$$

$$t_1: 32 \times 22.2 \mu\text{s} = 0.71 \text{ ms} \quad t_2: 32 \times 800 \mu\text{s} = 25.6 \text{ ms}$$

144 transients, 0.05 s recycle delay, experimental time = 15.4 hr

**Fig. S2.** Pulse sequence schematic and experimental parameters used for the three-dimensional  $\bar{\text{O}}\text{hNH}$  experiment.

-----  $\bar{\text{O}}\text{hNH}$  pulse sequence in Bruker format -----

```

; OihNH.ih - written by ivan
; - 3D H/N/O correlation under fast MAS
; - O(iso) -(CP)-> H -(CP)-> N -(CP)-> H

```

```

;parameters:
;ns : 24*n
;p1 : 1H 90 pulse at PL1
;p2 : 15N 90 pulse at PL2
;p3 : 170 90 pulse at PL3
;p7 : CT<->3Q conversion pulse at SP7
;p8 : ST-saturation WURST pulse at SP8
;p14 : 170->1H contact time at SP5(1H) + PL9(170)
;p15 : 1H->15N contact time at SP0(1H) + PL5(15N)
;p16 : 15N->1H contact time at SP1(1H) + PL6(15N)
;p27 : duration of water suppression (MISSISSIPI)
;pcpd1 : =25us for 10kHz waltz16
;pcpd2 : =25us for 10kHz waltz16
;d0 : initial t2 delay
;d1 : recycle delay
;d7 : =k*t1 delay for isotropic 170 evolution
;d20 : initial t1 delay
;in0 : =t2(15N) increment
;in7 : =k*t1 increment for isotropic 170 evolution
;in20 : =rotor period, t1(170) increment
;p11 : 1H pulse power level
;p12 : 15N pulse power level
;p13 : 170 pulse power level
;p15 : 15N CP(1H->15N) power level
;p16 : 15N CP(15N->1H) power level
;p19 : CP(170->1H) power level
;p111 : 1H dec power level
;p112 : 15N dec power level
;p120 : 170 saturation pulse power level
;p127 : 1H WS power level
;sp0 : 1H CP(1H->15N) power level
;sp1 : 1H CP(15N->1H) power level
;sp5 : 1H CP(1H->170) power level
;sp7 : CT<->3Q conversion power level
;sp8 : ST-saturation WURST power level
;spnam7 : COS shape, cosine amplitude-modulated pulse
;spnam8 : WURST shape, linear frequency sweep
;spoffs8 : ST-saturation WURST offset
;cpdprg1 : waltz16 at PL11
;cpdprg2 : waltz16 at PL12
;cnst31 : MAS frequency [Hz]
;l30 : # rotor periods for WURST pulse
;$TYPE=ivan

```

```

"p7=2s/cnst31"
"p8=1s*130/cnst31"
"d0=0"
"d20=0"
"d7=(2s/cnst31)*1.583333-p3"
"in7=in20*1.583333" ;k for S=5/2

```

```
aqseq 312
```

```

1 ze
2 10m do:f2
   d1

```

```

(p8:sp8 ph20):f3 ;WURST ST saturation pulse
3u

5u p11:f1 p15:f2 p13:f3
(p3 ph1):f3 ;170 90 pulse
(p7:sp7 ph1):f3 ;170 1Q->3Q
d20 ; 170 t1 evolution
(p7:sp7 ph20):f3 ;170 3Q->1Q
(p3*2 ph20 p13):f3 ;170 180 pulse
d7

(p14:sp5 ph22):f1 (p14 ph20 p19):f3 ;170->1H CP

(p15:sp0 ph20):f1 (p15 ph2 p15):f2 ;1H->15N CP
1u p11:f1
(1u cpds1):f1
(center (d0):f2 (p3*2 ph20 p13):f3) ;170 pi-pulse @ mid t2
2u
(ralign (1u do):f1 (p2 ph20 p12):f2) ;15N 90 for z-filter

(p27*0.25 ph20 p127):f1 ;MISSISSIPI
(p27*0.25 ph21):f1
(p27*0.25 ph22):f1
(p27*0.25 ph23):f1
(p2 ph3):f2 ;15N 90

(p16:sp1 ph4):f1 (p16 ph20 p16):f2 ;15N->1H CP
0.5u p112:f2
go=2 ph31 cpds2:f2 finally do:f2
1u do:f2
10m mc #0 to 2
    F1PH( calph(ph1,+30), caldel(d20,+in20)&caldel(d7,+in7) )
    F2PH( calph(ph2,+90), caldel(d0,+in0) )
exit

ph1=(12) 0 2 4 6 8 10
ph2= 1
ph3={1}*6 {3}*6
ph4={1}*12 {3}*12 {0}*12 {2}*12
ph20=0
ph21=1
ph22=2
ph23=3
ph31={{0 2 0 2 0 2}^2}^2^3^1
-----  $\bar{O}hNH$  pulse sequence in Bruker format -----

```



# ohNH<sup>{O}</sup>

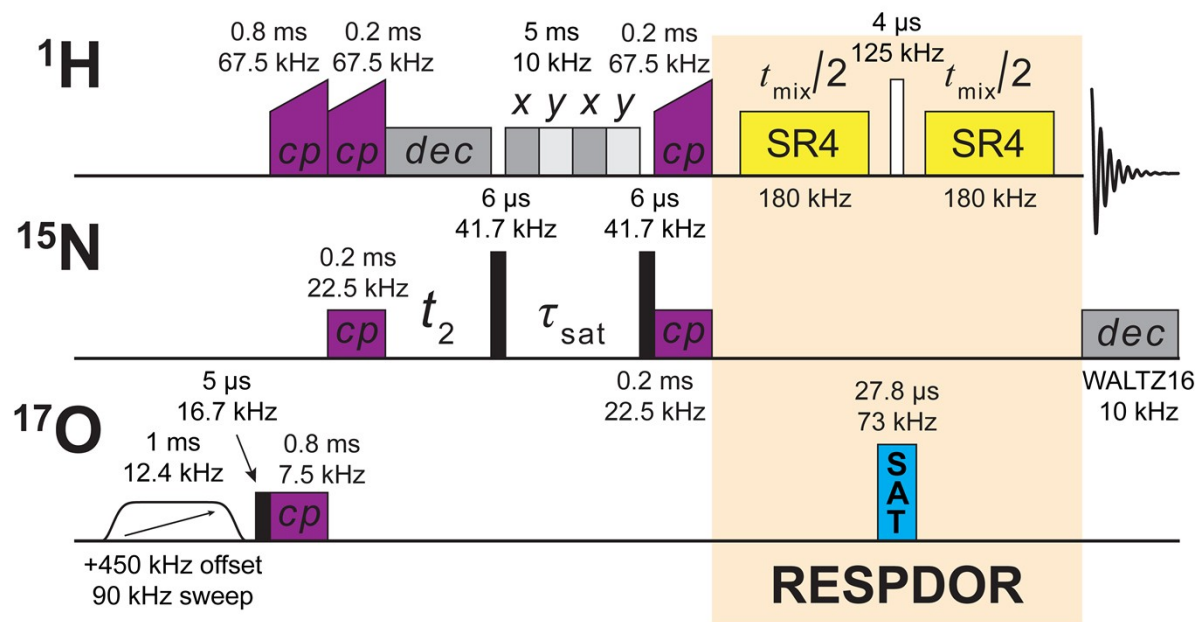

$$t_{\text{mix}}: 13 \times 66.7 \mu\text{s} = 8.7 \text{ ms} \quad t_2: 32 \times 800 \mu\text{s} = 25.6 \text{ ms}$$

384 transients, 0.05 s recycle delay, experimental time = 7.7 hr

**Fig. S3.** Pulse sequence schematic and experimental parameters used for the three-dimensional ohNH<sup>{O}</sup> experiment.

```
----- OhNH{O} pulse sequence in Bruker format -----
; OhNHo.ih - written by ivan
; - 3D H/N/O correlation under fast MAS
; - pseudo-3D hNH spectra with 17O/1H RESPDOR in the 3rd dimension
; - SR4 1H/17O dipolar recoupling

;parameters:
;ns : 32*n
;p1 : 1H 90 pulse at PL1
;p2 : 15N 90 pulse at PL2
;p3 : 17O 90 pulse at PL3
;p8 : ST-saturation WURST pulse at SP8
;p14 : 17O->1H contact time at SP5(1H) + PL9(17O)
;p15 : 1H->15N contact time at SP0(1H) + PL5(15N)
;p16 : 15N->1H contact time at SP1(1H) + PL6(15N)
;p20 : 17O RESPDOR saturation pulse at PL20
;p21 : 1H SR4 pulse at PL10, =tr/4
;p27 : duration of water suppression (MISSISSIPI)
;pcpd1 : =25us for 10kHz waltz16
;pcpd2 : =25us for 10kHz waltz16
;d0 : initial t2 delay
```

```

;d1 : recycle delay
;in0 : =t2(15N) increment
;p11 : 1H pulse power level
;p12 : 15N pulse power level
;p13 : 170 pulse power level
;p15 : 15N CP(1H->15N) power level
;p16 : 15N CP(15N->1H) power level
;p19 : CP(170->1H) power level
;p110 : =2vr, 1H SR4 power level
;p111 : 1H dec power level
;p112 : 15N dec power level
;p120 : 170 saturation pulse power level
;p127 : 1H WS power level
;sp0 : 1H CP(1H->15N) power level
;sp1 : 1H CP(15N->1H) power level
;sp5 : 1H CP(1H->170) power level
;sp8 : ST-saturation WURST power level
;spnam8 : WURST shape, linear frequency sweep
;spoffs8 : ST-saturation WURST offset
;cpdprg1 : waltz16 at PL11
;cpdprg2 : waltz16 at PL12
;cnst20 : # rotor periods for 170 RESPDOR saturation pulse
;cnst31 : MAS frequency [Hz]
;l8 : L8*2 = # SR4 rotor periods to increment mixing time per t1
;l10 : initial # SR4 rotor periods
;l30 : # rotor periods for WURST pulse
;$TYPE=ivan

"p8=1s*130/cnst31"
"p20=1s*cnst20/cnst31"
"p21=0.25s/cnst31"

"d0=0"
"d25=(1s/cnst31)"
"d26=(0.25s/cnst31)"
"d28=(1s/cnst31)-0.5u"

"l0=0"
"l2=0"
"l8=l10"
"cnst6=0"
"cnst8=0"

aqseq 312

1 ze
2 10m do:f2

5u rpp16
5u rpp17
5u rpp18
5u rpp19

"cnst6=180*trunc(((l2)/16)%2)"
5u ip16+cnst6
5u ip17+cnst6
5u ip18+cnst6

```

```

5u ip19+cnst6

d1

(p8:sp8 ph20):f3 ;WURST ST saturation pulse
3u

5u pl1:f1 pl5:f2 pl3:f3
(p3 ph1):f3 ;170 90 pulse

(p14:sp5 ph22):f1 (p14 ph20 pl9):f3 ;170->1H CP

(p15:sp0 ph20):f1 (p15 ph2 pl5):f2 ;1H->15N CP
1u pl11:f1
(1u cpds1):f1
(center (d0):f2 (p3*2 ph20 pl3):f3) ;170 pi-pulse @ mid t2
2u
(ralign (1u do):f1 (p2 ph20 pl2):f2) ;15N 90 for z-filter

(p27*0.25 ph20 pl27):f1 ;MISSISSIPI
(p27*0.25 ph21):f1
(p27*0.25 ph22):f1
(p27*0.25 ph23):f1
(p2 ph3):f2 ;15N 90

(p16:sp1 ph4):f1 (p16 ph20 pl6):f2 ;15N->1H CP

if "l2%2==0"{
    d25 pl20:f3
}
if "l2%2==1"{
    d25 pl=0[Watt]:f3
}
15 (p21 ph16 pl10):f1
    (p21 ph17):f1
    (p21 ph16^):f1
    (p21 ph17^):f1
    lo to 15 times l10
d26
(center (p1*2 ph5 pl1):f1 (p20 ph20):f3)
d26
25 (p21 ph18 pl10):f1
    (p21 ph19):f1
    (p21 ph18^):f1
    (p21 ph19^):f1
    lo to 25 times l10
d28

0.5u pl12:f2
go=2 ph31 cpds2:f2 finally do:f2
1u do:f2
10m mc #0 to 2
    F1PH( calph(ph2,+90), caldel(d0,+in0) )
    F2PH( calclc(l2,+1), calclc(l10,+l8) )
exit

ph1= 1 3

```

```
ph2= 1
ph3= 1 1 3 3
ph4= 1
ph5={0}*4 {1}*4 {2}*4 {3}*4
ph16=(360) 90 270 210 30 330 150
ph17=(360) 270 90 30 210 150 330
ph18=(360) 90 270 210 30 330 150
ph19=(360) 270 90 30 210 150 330
ph20=0
ph21=1
ph22=2
ph23=3
ph31={0 2 2 0}^2
```

----- OhNH<sup>{0}</sup> pulse sequence in Bruker format -----

## Acknowledgements

This work was supported by the National High Magnetic Field Laboratory (NHMFL, USA) through NSF DMR-1644779 and the State of Florida. In addition, we acknowledge the support of the National Institutes of Health through grants AG058504, GM132997 and GM132079 to RGG. Use of the NHMFL NMR facility is available free of charge; for more information please visit <https://nationalmaglab.org/user-facilities/nmr-mri>.

## Notes and references

- 1 M. S. Seyfried, B. S. Lauber and N. W. Luedtke, *Org. Lett.*, 2010, **12**, 104–106.
- 2 E. G. Keeler, V. K. Michaelis, M. T. Colvin, I. Hung, P. L. Gor'kov, T. A. Cross, Z. Gan and R. G. Griffin, *J. Am. Chem. Soc.*, 2017, **139**, 17953–17963.
- 3 E. Kupce and R. Freeman, *J. Magn. Reson. A*, 1995, **115**, 273–276.
- 4 N. M. Trease, K. K. Dey and P. J. Grandinetti, *J. Magn. Reson.*, 2009, **200**, 334–339.
- 5 I. Hung, *J. Magn. Reson.*, 2021, **324**, 106913.
- 6 I. Hung and Z. Gan, *J. Magn. Reson.*, 2021, **328**, 106994.
- 7 D. Massiot, B. Touzo, D. Trumeau, J. P. Coutures, J. Virlet, P. Florian and P. J. Grandinetti, *Solid State Nucl. Magn. Reson.*, 1996, **6**, 73–83.
- 8 S. P. Brown and S. Wimperis, *J. Magn. Reson.*, 1997, **128**, 42–61.
- 9 Z. Gan, *Chem. Commun.*, 2006, 4712–4714.
- 10 A. Brinkmann and A. P. M. Kentgens, *J. Am. Chem. Soc.*, 2006, **128**, 14758–14759.
- 11 X. Lu, O. Lafon, J. Trébosc and J.-P. Amoureux, *J. Magn. Reson.*, 2012, **215**, 34–49.
- 12 A. Venkatesh, M. P. Hanrahan and A. J. Rossini, *Solid State Nucl. Magn. Reson.*, 2017, **84**, 171–181.
- 13 R. K. Harris, E. D. Becker, S. M. C. De Menezes, R. Goodfellow and P. Granger, *Pure Appl. Chem.*, 2001, **73**, 1795–1818.
- 14 J. P. Amoureux, C. Huguenard, F. Engelke and F. Taulelle, *Chem. Phys. Lett.*, 2002, **356**, 497–504.
